# Supplementary material
Source: publisher figshare collection journal article supplement (https://acs.figshare.com/ndownloader/files/3824908)
Supplement: Supplementary file 1 [file 3824908]

## SUPPORTING INFORMATION

**Table SI1.** The comparison of characterization results of xylenes from Ecoinvent and US LCI by ReCiPe endpoint

| Impact category                 | Unit         | US LCI   | Ecoinvent |
|---------------------------------|--------------|----------|-----------|
| Fossil depletion                | kg oil eq    | 0        | 0.002391  |
| Metal depletion                 | kg Fe eq     | 0        | 0         |
| Water depletion                 | m3           | 0        | 8.303883  |
| Natural land transformation     | m2           | 0        | -8.2E-05  |
| Urban land occupation           | m2a          | 0        | 0.065173  |
| Agricultural land occupation    | m2a          | 0        | 0.029242  |
| Ionising radiation              | kBq U235 eq  | 0        | 0.546267  |
| Marine ecotoxicity              | kg 1,4-DB eq | 16.56212 | 1.134174  |
| Freshwater ecotoxicity          | kg 1,4-DB eq | 16.84403 | 0.296582  |
| Terrestrial ecotoxicity         | kg 1,4-DB eq | 0.005545 | 0.060794  |
| Particulate matter formation    | kg PM10 eq   | 2.025955 | 1.380628  |
| Photochemical oxidant formation | kg NMVOC     | 7.00228  | 4.792205  |
| Human toxicity                  | kg 1,4-DB eq | 2023.5   | 12.76112  |
| Marine eutrophication           | kg N eq      | 0.202245 | 0.097999  |
| Freshwater eutrophication       | kg P eq      | 0        | 0.013282  |
| Terrestrial acidification       | kg SO2 eq    | 7.786484 | 4.102556  |
| Ozone depletion                 | kg CFC-11 eq | 4.08E-07 | 3.14E-07  |

**Table SI2.** The selection of Pedigree matrix indicator [49]

|                                      | Score | Description                                                                                                                           | Uncertainty factors | Selection |
|--------------------------------------|-------|---------------------------------------------------------------------------------------------------------------------------------------|---------------------|-----------|
| U <sub>1</sub> -Reliability          | 1     | Verified data based on measurement                                                                                                    | 1.00                |           |
|                                      | 2     | Verified data partly based on assumptions or non-verified data based on measurements                                                  | 1.05                |           |
|                                      | 3     | Non-verified data partly based on qualified estimates                                                                                 | 1.10                |           |
|                                      | 4     | Qualified estimate based on data derived from theoretical information                                                                 | 1.20                | √         |
|                                      | 5     | Non-qualified estimate                                                                                                                | 1.50                |           |
| U <sub>2</sub> -Completeness         | 1     | Representative data from all sited relevant for the market considered, over an adequate period even out normal fluctuations           | 1.00                |           |
|                                      | 2     | Representative data from >50% of the sites relevant for the market considered, over an adequate period even out normal fluctuations   | 1.02                |           |
|                                      | 3     | Representative data from only some sited ( $\leq 50\%$ ) relevant for the market considered or >50% of sites but from shorter periods | 1.05                |           |
|                                      | 4     | Representative data from only one site relevant for the market considered or some sites but from shorter periods                      | 1.10                |           |
|                                      | 5     | Representativeness unknown or data from a small number of sites and from shorter periods                                              | 1.20                | √         |
| U <sub>3</sub> -Temporal correlation | 1     | Less than 3 years of difference to the time periods of the dataset                                                                    | 1.00                |           |
|                                      | 2     | Less than 6 years of difference of the time period of the dataset                                                                     | 1.03                |           |

|                                                   |   |                                                                                                                                               |      |   |
|---------------------------------------------------|---|-----------------------------------------------------------------------------------------------------------------------------------------------|------|---|
|                                                   | 3 | Less than 10 years of difference to the time period of the dataset                                                                            | 1.10 | √ |
|                                                   | 4 | Less than 15 years of difference to the time period of the dataset                                                                            | 1.20 |   |
|                                                   | 5 | Age of data unknown or more than 15 years of difference to the time period of the dataset                                                     | 1.50 |   |
| U <sub>4</sub> -Geographical correlation          | 1 | Data from area under study                                                                                                                    | 1.00 |   |
|                                                   | 2 | Average data from larger area in which the area under study is included                                                                       | 1.01 |   |
|                                                   | 3 | Data from area with similar production conditions                                                                                             | 1.02 |   |
|                                                   | 4 | Data from area with slightly similar production conditions                                                                                    |      |   |
|                                                   | 5 | Data from unknown or distinctly different area                                                                                                | 1.10 | √ |
| U <sub>5</sub> -Further technological correlation | 1 | Data from enterprises, processes and materials under study (i.e. identical technology)                                                        | 1.00 |   |
|                                                   | 2 |                                                                                                                                               |      |   |
|                                                   | 3 | Data on related processes or materials but same technology, OR<br>Data from processes and materials under study but from different technology | 1.20 |   |
|                                                   | 4 | Data on related processes or materials but different                                                                                          | 1.50 |   |

|                             |   |                                                                                              |      |   |
|-----------------------------|---|----------------------------------------------------------------------------------------------|------|---|
|                             |   | technology, OR data on<br>laboratory scale processes<br>and same technology                  |      |   |
|                             | 5 | Data on related processes or materials but<br>on laboratory scale of different<br>technology | 2.00 | √ |
| U <sub>6</sub> -Sample size | 1 | >100, continuous<br>measurement, balance of<br>purchased products                            | 1.00 |   |
|                             | 2 | >20                                                                                          | 1.02 |   |
|                             | 3 | >10                                                                                          | 1.05 |   |
|                             | 4 | ≥3                                                                                           | 1.10 |   |
|                             | 5 | unknown                                                                                      | 1.20 | √ |

**Table SI3.** Heat duty of each unit

|               | Heat Duty             | GJ/ton<br>pX |                       | GJ/ton<br>pX |
|---------------|-----------------------|--------------|-----------------------|--------------|
|               | Original<br>Flowsheet |              | Modified<br>Flowsheet |              |
| R1            | 144.28                |              | 144.28                |              |
| R2            | -178.06               |              | -176.46               |              |
| R3            | -2.26                 |              | -1.83                 |              |
| R4            | -1.92                 |              | -0.88                 |              |
| FL1           | 33.14                 |              | 37.84                 |              |
| FL2           | -10.78                |              | -10.82                |              |
| FL4           | -2.00                 |              | -1.66                 |              |
| FL5           |                       |              | -0.08                 |              |
| D             | -3.66                 |              | -5.48                 |              |
| EVAP          | 4.41                  |              | 4.21                  |              |
|               | condenser             | reboiler     | condenser             | reboiler     |
| DC1           | -84.73                | 50.05        |                       |              |
| DC2           | -15.84                | 18.63        | -15.89                | 18.25        |
| DC3           | -1.22                 | 1.28         | -1.47                 | 1.33         |
| DC4           | -0.11                 | 0.12         | -0.12                 | 0.13         |
| DC5           | -6.95                 | 10.13        | -3.47                 | 6.69         |
| DC6           | -0.72                 | 0.18         | -1.18                 | 0.48         |
| Before<br>HEN | Heating               | Cooling      | Heating               | Cooling      |
|               | 262.23                | -308.24      | 213.21                | -219.26      |
| After         | Heating               | Cooling      | Heating               | Cooling      |

|     |        |         |       |        |
|-----|--------|---------|-------|--------|
| HEN |        |         |       |        |
|     | 112.47 | -158.79 | 68.11 | -73.84 |

1 Negative represents that cooling utility usage
